# Supplementary material for: Dysregulation of Synaptic and Developmental Transcriptomic/Proteomic Profiles upon Depletion of MUNC18-1
Source: eNeuro. 2022 Nov 9;9(6):ENEURO.0186-22.2022. doi: 10.1523/ENEURO.0186-22.2022 (PMC9668351; doi:10.1523/ENEURO.0186-22.2022)
Supplement: Extended Data Table 2-1 — Protein lists Gene Ontology analysis. Download Table 2-1, XLS file. [file enu-eN-NWR-0186-22-s08.xls]

## Sheet: RNAseq 
Function	Groups	Group Genes
phagocytosis, engulfment	Group00	ABCA1|AIF1|ARHGAP25|BIN2|CD300A|CD36|FCER1G|FCGR2C|GSN|IGHM|ITGB2|MFGE8|MSR1|MYH9|NCKAP1L|THBS1|TREM2
small GTPase mediated signal transduction	Group01	A2M|ABCA1|ABR|ADCYAP1R1|AIF1|AKAP13|APOE|ARAP1|ARHGAP15|ARHGAP25|ARHGAP26|ARHGAP28|ARHGAP29|ARHGAP30|ARHGAP33|ARHGAP44|ARHGAP45|ARHGAP9|ARHGDIB|ARHGDIG|ARHGEF12|ARHGEF25|ARHGEF28|ARHGEF4|BDH2|CD2AP|CDC42EP1|CDC42EP3|CDH13|CDKN1A|CFL1|CGNL1|COL1A2|CRK|CSF1|CYR61|CYTH4|DAB1|DAB2IP|DHCR24|DOCK2|DOCK8|DOCK9|DYNLL1|FARP1|FGF2|GNB1|GPR17|HMOX1|HRAS|IGF1|INPP5F|IQSEC1|ITPKB|JUN|KCTD13|KNDC1|KSR1|MADD|MA…
wound healing, spreading of cells	Group02	ACVRL1|ADAM17|CD151|COL5A1|CYR61|DDR1|HBEGF|ITGA5|MMP12|PHLDB2|PPP3CA|RASGRF1|TEP1|TPP1|WNT7A
vascular endothelial growth factor receptor signaling pathway	Group03	ARNT|AXL|CRK|CSE1L|CYBA|CYFIP2|DAB2IP|EMILIN1|FGF9|FOXC1|GRB10|HARS|HHEX|ITGA5|MT3|MYOF|NAA25|NCF1|NCF2|NCKAP1|NCKAP1L|NELL1|NELL2|PIK3CB|PRKCB|PRKD2|PTK2B|PTPN1|PXDN|PXN|VAV1|VTN|WASF2
inner ear development	Group04	ABR|C1QB|CEBPA|CECR2|CHD7|CTHRC1|CXCL14|CYR61|DLX5|DLX6|ESRRB|FGF9|FRZB|FZD2|FZD6|GABRA5|GABRB2|GABRB3|GJB6|IER3|INHBA|INSIG1|KCNA4|KCNK3|KIF3A|LIN7A|LRIG3|MAF|MAFB|MAPK1|NAGLU|NEUROD1|NOTCH1|OPA1|PAFAH1B1|PPP3CA|PRRX1|PTPRR|RBPJ|RHBDF2|RORA|SDC4|SFRP1|SLC4A8|SOBP|SPARC|SPRY2|TEC|TNFSF13|TPRN|YWHAE|ZEB1
cellular response to low-density lipoprotein particle stimulus	Group05	ABCA1|CD36|CD81|CD9|CDH13|FCER1G|HMGCS1|ITGB2|LCP1|LDLR|SREBF2|SYK
memory	Group06	ABCB6|ADCY1|APOE|ATXN1|B4GALT2|BRINP1|CALB1|CAMK2G|CAMK4|CCK|CTNS|CUX2|CX3CR1|GPRIN1|GRIN1|GRIN2A|HTR2A|ITGA5|KCNK4|LDLR|LGMN|MAP1A|MDK|NETO1|PAK6|PJA2|PLK2|PPP1R1B|PPP3CB|PRKCZ|RASGRF1|SHANK1|SHANK2|SLC17A7|SLC24A2|SLC8A2|SLC8A3|TAC1|TEP1
regulation of actin cytoskeleton reorganization	Group07	ARHGDIB|CD2AP|CSF1R|CTSV|EEF1A2|FDPS|HCK|HCLS1|HRAS|MTTP|NELL1|NTF3|PDGFRA|PTK2B|RAPGEF4|TEK|TRPC7|YWHAB
regulation of epithelial to mesenchymal transition	Group08	ACVR1|AXIN2|BMP5|DAB2|DAB2IP|DACT3|EFNA1|EPHA5|FOXC1|GLIPR2|GREM1|INHBA|LDLRAD4|LEF1|LOXL2|NOTCH1|PHLDB2|PPP2CA|RGCC|SFRP1|SFRP2|STRAP|TCN2|TEP1|TGFB1I1|TGFBR2|TRIM62|ZNF703
central nervous system neuron differentiation	Group09	ACKR3|AGTPBP1|ASCL1|BTG2|CDH11|CEND1|CHD5|CSF1R|DCLK1|DLX1|DLX2|DLX5|DRAXIN|EMX1|EOMES|EPHB1|ERBB4|GABRB1|GDPD5|INHBA|KNDC1|LEF1|LHX1|LHX6|MAP2|MAPK1|MDGA1|MDGA2|MTPN|NELL1|NELL2|NPY|PAFAH1B1|PAM|RAC3|RASGRF1|ROBO1|ROBO2|RORA|SALL3|SATB2|SFRP1|SFRP2|SLC4A10|SOX1|SPOCK1|SUFU|TEP1|UNC5D|WNT7A|YWHAE
regulation of actin cytoskeleton organization	Group10	ACTR2|ACTR3|ACTR3B|AKAP13|ANGPTL2|ANGPTL4|ARAP1|ARHGAP28|ARHGAP44|ARHGDIB|ARPC1B|ARPC5|ASAP3|CAPG|CARMIL1|CD2AP|CDC42EP1|CDC42EP3|CFL1|CRK|CSF1R|CTGF|CTSV|CX3CL1|DMTN|DYNLL1|EEF1A2|EPHA5|FAM107A|FDPS|FHOD3|FMN1|GSN|HCK|HCLS1|HRAS|ICAM1|INHBA|IQGAP2|MAGEL2|MEF2C|MTPN|MTTP|MYOC|NAA25|NCKAP1|NCKAP1L|NEB|NELL1|NF2|NTF3|PAM|PDGFRA|PFN2|PHLDB2|PLEK|PPM1E|PTK2B|PXDN|PXN|RAPGEF4|RASGRF1|RGCC|SDC4|SFRP1|S…
platelet degranulation	Group11	A2M|ANXA5|APPL2|CALM1|CD36|CD63|CD9|DMTN|ENDOD1|F13A1|FAM3C|FAM49B|FCER1G|FERMT3|FN1|HGF|ICAM5|IER3|IGF1|IGF2|ISLR|LHFPL2|LYN|OLA1|PCDH7|PF4|PLEK|PROS1|QSOX1|SELENOP|SERPING1|SNAP91|SPARC|STXBP1|SYK|TF|THBS1|TIMP3|TLN1|TUBA4A
exocytosis	Group12	A2M|ABR|ACLY|ACTR2|ACTR3B|ADCY1|AGA|ALDH1A1|ALDH9A1|ANGPTL2|ANK1|ANXA5|APBA1|APPL2|ARHGAP44|ARHGAP45|ARHGAP9|ARMC8|ARNT|ARPC5|ATP6V1C1|B2M|B4GALT1|BIN2|C3AR1|C5AR1|CAB39|CADPS2|CALM1|CALM3|CAMK2A|CAT|CD14|CD300A|CD36|CD53|CD59|CD63|CD68|CD84|CD9|CDK5R2|CHRM2|CPNE3|CRCP|CREG1|CRISPLD2|CSTB|CTSA|CTSB|CTSC|CTSH|CTSS|CTSZ|CYBA|DAB2IP|DMTN|DNAJC5|DOC2A|DOC2B|DOCK2|DYNLL1|EEF1A2|ENDOD1|ERC2|EXOC3|EXOC5…
regulation of myeloid cell differentiation	Group13	ACKR3|ARNT|B2M|C1QC|CAMK2G|CAMK4|CSF1|CSF3R|CTNNBIP1|EEF1A2|EIF4E|ETS1|EVI2B|FAM210B|FBN1|FBXW7|FDPS|FOS|FOXO3|GPR68|HCLS1|ID2|INHBA|INPP5D|ITPKB|JUN|KAT2B|L3MBTL1|L3MBTL2|LEF1|LGALS3|LYN|MAFB|MEF2C|MITF|NCKAP1L|NME2|PF4|PRKCA|PRKCB|PRMT1|PTK2B|RBP1|RHBDF2|RORA|SFRP1|SMAP1|SPI1|STAT3|TEC|TESC|THBS1|TLR4|TMEM178A|TYROBP|UBASH3B|YWHAB|ZBTB16|ZFP36L1
regulation of synapse assembly	Group14	ACKR3|CBLN2|CDH9|CUX2|DAB2IP|EIF4E|EPHA7|EPHB1|ERBB4|FARP1|FLRT1|FLRT3|GPRIN1|GRIN1|KIRREL3|LRFN1|LRFN4|LRFN5|LRRC4B|LRRN1|LRRN3|LRRTM1|MAPK1|MDGA1|MEF2C|NRCAM|NRXN3|NTNG2|PCLO|PTPRD|PTPRS|ROBO2|SHANK2|SLITRK1|SLITRK5|SPTBN2|TEP1|THBS2|TLR2|TPBG|UBE2V2|WNT7A
acyl-CoA metabolic process	Group15	ACLY|ACOT7|ACSBG1|ACSF2|ACSL3|ACSL5|ACSL6|ACSS2|BCL2A1|CAT|CLEC7A|ELOVL4|ELOVL6|FAR2|HSD17B12|ITGB2|MCEE|MPC1|MVD|MVK|NUDT7|PDHB|PDK2|PDP1|PIPOX|PMVK|SCD|SLC25A1|TECR
negative regulation of cell motility	Group16	ABR|ACVRL1|ADAMTS9|ADORA1|AIF1|ANGPT2|APOD|APOE|ARHGDIB|ARNT|ATP1A3|BMP5|C5orf30|CACYBP|CD300A|CRK|CTNNA1|CX3CL1|CX3CR1|CYP1B1|DAB2IP|DCN|DPYSL3|DYNLL1|EMILIN1|ENC1|ERBB4|FBLN1|FGF2|FOXO3|GREM1|HMOX1|IFITM1|IGFBP5|INHBA|KANK2|LDLRAD4|MCC|MEF2C|MITF|MMP24|MMP28|NAV3|NF2|NFE2L2|NOTCH1|NOV|NRG3|PADI2|PFN2|PHLDB2|PTK2B|PTPRJ|PTPRM|PTPRR|RECK|RGCC|ROBO1|SEMA6D|SFRP1|SFRP2|SINHCAF|SPOCK3|SRGAP1|STAT3|S…
platelet activation	Group17	ABAT|APOE|AXL|CD9|COL1A2|DGKE|DGKG|DGKH|DMTN|ENTPD2|FCER1G|FERMT3|FZD6|GNB1|GNG2|ICAM5|ITGA9|LCP2|LYN|MAPK1|MERTK|MYH9|PAWR|PDGFRA|PF4|PIK3CB|PLCG2|PLEK|PRKCA|PRKCB|PRKCG|PRKCH|PTPN6|RHBDF2|SELENOP|SLC7A11|STXBP1|SYK|TEC|TLN1|TLR4|TRPC3|TRPC6|TRPC7|UBASH3B|VAV1|YWHAZ
regulation of regulated secretory pathway	Group18	ABR|ADCY1|APBA1|CADPS2|CALM1|CALM3|CAMK2A|CD300A|CD84|CDK5R2|CHRM2|DNAJC5|DOC2A|DOC2B|ERC2|FCER1G|FCGR2C|FDPS|HMOX1|HTR2A|ITGB2|KCNB1|LYN|NAPB|NOTCH1|NRXN3|PCLO|PFN2|PIP5K1C|PPP3CB|PRKCG|PTAFR|RAC2|RAPGEF4|RIMS1|RIMS4|RPH3A|SNAP25|SNAP47|SNAP91|SNPH|STX1A|STXBP1|SV2A|SYK|SYT13|SYT3|SYT6|TRIM9|VAMP2|VAMP8|WNT7A
receptor-mediated endocytosis	Group19	AAK1|ABR|ACKR3|AP1S1|AP2M1|APOBR|APOC1|APOE|AXL|B2M|C2|CACNG2|CALM1|CALM3|CAMK1D|CD14|CD151|CD163|CD2AP|CD300A|CD36|CD63|CD81|CD9|CDH13|CLTB|COLEC12|CX3CR1|CYBA|DAB2|DAB2IP|DNM1|DOCK2|EGFR|EHD4|ENPP1|ENPP2|EPHA5|FCER1G|FCGR2C|FN1|FNBP1L|GREM1|GRK2|HCK|HSPH1|INPP5F|ITGA4|ITGB2|KIF3A|LDLR|LGALS3|LOXL1|LOXL2|LRPAP1|LRRTM1|LY6E|MERTK|MFGE8|MRC1|MSR1|MTTP|MYO18A|NCKAP1L|NECAB2|NTF3|PCSK9|PIK3CB|PIP5K1…
chemical synaptic transmission	Group20	ABAT|ABCB6|ABR|ADCY1|ADORA1|AKAP7|AMPH|APBA1|APOE|BCHE|CACNB1|CACNB2|CACNB4|CACNG4|CADPS2|CALB1|CALM1|CALM3|CAMK2A|CDH11|CDH8|CELF4|CHRM1|CHRM2|CNIH2|CNTN4|CORT|CUX2|CX3CL1|CX3CR1|DGKE|DLG2|DLGAP2|DNAJC5|DNM1|DOC2A|DOC2B|DPYSL3|EGFR|EGR3|EIF4E|EPHB1|ERC2|ETV5|FAM107A|FGF12|GABRA5|GABRB2|GABRB3|GABRG2|GAD1|GAD2|GFAP|GLRB|GNAI1|GPR176|GPRIN1|GRIK3|GRIN1|GRIN2A|GRIN2D|GRM1|GRM5|GUCY1A1|GUCY1B1|HCRTR…
phagocytosis	Group21	ABCA1|ABCB6|ABR|ACTR2|ACTR3|ADORA1|AIF1|ANGPTL2|ARHGAP25|ARHGEF28|ARPC1B|ARPC5|AXL|BIN2|C2|C3AR1|C5AR1|CALM1|CAMK1D|CD14|CD28|CD300A|CD36|CDH11|CLEC7A|CMTM3|COLEC12|CRK|CSE1L|CYBA|CYFIP2|DENND1B|DOCK2|EIF4E|ELF1|FCER1G|FCGR2C|FCGR3A|FCGRT|FOS|FYB1|GSN|HCK|HCRTR2|HRAS|ICAM5|IGHM|INPP5D|IRF8|ITGB2|JUN|KLHL6|LBP|LCP2|LEPR|LGALS3|LYN|MAPK1|MAPK10|MAPK8|MDK|MEF2C|MERTK|MFGE8|MSR1|MTTP|MYH9|MYO18A|NAA2…
regulation of ion transmembrane transporter activity	Group22	ABCB1|ABCB6|ABCC9|ADORA1|AHNAK|AKAP7|ATF4|ATP1A3|ATP1B1|CAB39|CACNB1|CACNB2|CACNB4|CACNG2|CACNG3|CACNG4|CACNG8|CALM1|CALM2|CALM3|CD63|CDKN1A|CHD7|CMPK1|CNIH2|COL9A2|CTSS|CX3CL1|CYBA|DPP10|FGF12|FXYD7|GOPC|GPD1L|GRM5|HCN1|HCN2|HOMER1|HTR2A|HTR3A|HVCN1|JPH4|KCNA3|KCNA4|KCNB1|KCNC1|KCNC4|KCND2|KCNG1|KCNG2|KCNIP1|KCNIP2|KCNIP3|KCNJ11|KCNJ3|KCNJ4|KCNK1|KCNK12|KCNK3|KCNK4|KCNMA1|KCNQ3|KCNQ5|KCNV1|LGALS…
angiogenesis	Group23	ACKR3|ACVR1|ACVRL1|ADAM17|ADAMTS9|AKT3|AMOTL1|ANGPT2|ANGPTL4|ANTXR1|APOD|APOE|ARNT|ATF4|ATP5F1B|ATP5MC1|B4GALT1|C3AR1|C5AR1|CACYBP|CDH11|CDH13|CDH5|CFLAR|CHD7|CLEC14A|CLN5|CNMD|CNTN1|COL18A1|COL1A2|COL4A1|COL4A2|COL5A1|CREB3L1|CSE1L|CTGF|CTSB|CTSH|CX3CL1|CX3CR1|CYP1B1|CYR61|DAB2IP|DCN|DDAH1|DDAH2|DDIT3|DHCR7|DNAJC5|EDNRA|EFNA1|EFNA3|EFNB2|EGR1|EGR3|EMILIN1|ENPP2|EPHB1|EPHB4|ETS1|FAT2|FBXW7|FGF2|F…
secondary alcohol biosynthetic process	Group24	ABCA1|ABCG1|ACADL|ACADVL|ACAT2|ACLY|ADCYAP1R1|APOBR|APOC1|APOE|ATP1A3|BCL2A1|BMP5|BMP6|CACNB1|CAT|CDH11|CEBPA|CYP51A1|DHCR24|DHCR7|DISP3|DKK3|DKKL1|EGR1|ELOVL6|ERG28|FDFT1|FDPS|HMGCR|HMGCS1|HMGCS2|HSD17B7|IDI1|INSIG1|LDLR|LEPR|LGALS1|LRP5|LSS|MAS1|MSMO1|MT3|MVD|MVK|NPC2|P2RY6|PCSK9|PLEK|PMVK|PRKAA2|PTAFR|PTK2B|RORA|RXRA|SC5D|SCD|SCRN1|SLC20A1|SORL1|SQLE|SREBF2|STARD4|TM7SF2

## Sheet: Proteomics
Function	Groups	Group Genes
ATPase-coupled cation transmembrane transporter activity	Group4	ANK2	APEX1	ATP1A1	ATP1A2	ATP1A3	ATP1B1	ATP2B1	ATP6V0A1	ATP6V0D1	ATP6V1A	ATP6V1B2	ATP6V1C1	ATP6V1E1	ATP6V1F	ATP6V1H	ATP8A1	CAB39	CACNA2D3	CLTC	DLG2	DPP6	GPRIN1	GRIA2	NCS1	NRXN1	PANX1	PRKACA	SLC1A4	SLC6A1	SLC6A11	SNAP25	STX1A	TUSC3	VAMP2	YWHAE	YWHAH
actin filament organization	Group2	ABI1	ABI2	ACTN1	ADD1	ADD2	ARHGEF2	ARHGEF7	ARPC1A	ARRB1	CAPG	CD47	CTNNA1	CTNNA2	CTTN	CYFIP2	DBN1	DPYSL3	LCP1	LIMA1	MYO5A	NCAPG	PAK1	PAK2	PICK1	PPP1R9A	PPP1R9B	RAC3	RUFY3	SPTAN1	SPTBN1	STMN1
chemical synaptic transmission	Group5	ABAT	AMPH	APEX1	ATP1A2	CADPS	CALB2	CAMK2A	CAMK2B	CREB1	CTBP2	DBN1	DHX15	DLG2	DNAJC6	DNM1	DNM3	EGFR	GABBR1	GIT1	GNAI1	GPRIN1	GRIA2	HRAS	LGMN	MAP1B	MAPT	NAPB	NCDN	NCS1	NRXN1	NTRK2	PICALM	PICK1	PLCB1	PPP1R9A	PPP1R9B	PPP3CA	PPP3CB	PREPL	PRKACA	PRKAR2B	RAB3A	RAC3	SH3GL1	SLC1A4	SLC6A1	SNAP25	SNAP91
double-strand break repair via break-induced replication	Group3	MCM2	MCM3	MCM4	MCM5	MCM6	MCM7
mRNA metabolic process	Group0	AGO1	ANP32A	APEX1	CNOT10	DDX46	DHX15	DHX36	DIS3	EXOSC8	FRG1	FUS	FXR1	GTF2F2	HNRNPLL	METTL16	NCBP1	NSUN2	PCBP1	PCBP2	PRKACA	PSIP1	PTBP1	RNH1	RPRD1A	SART3	SCAF8	SSB	SUPT5H	THRAP3	VIM	XPO1	YWHAZ
modulation of chemical synaptic transmission	Group7	ABAT	AKT2	AMPH	APEX1	ATP1A2	CADPS	CALB2	CAMK2A	CAMK2B	CREB1	CTBP2	DBN1	DHX15	DLG2	DNAJC6	DNM1	DNM3	DPYSL2	EGFR	GABBR1	GIT1	GNAI1	GPRIN1	GRIA2	HRAS	LGMN	MAP1B	MAPT	NAPB	NCDN	NCS1	NRXN1	NTRK2	PICALM	PICK1	PIP4K2B	PLCB1	PPP1R9A	PPP1R9B	PPP3CA	PPP3CB	PREPL	PRKACA	PRKAR2B	RAB3A	RAC3	SH3GL1	SLC1A4
neuron development	Group6	ABI2	AKT2	AP2A1	APEX1	ARHGEF2	ARHGEF7	CAMK2A	CAMK2B	CAMK2G	CD44	CNTN1	CREB1	CRMP1	CTNNA1	CTNNA2	CTTN	DBN1	DCLK1	DHFR	DHX36	DNM3	DPYSL2	DPYSL3	DPYSL4	DPYSL5	EGFR	FNBP1L	FXR1	GDI1	GIT1	GNAO1	GPRIN1	HEXB	HMGB1	HMGB2	HRAS	IQGAP1	KIF1A	KIF5C	MAP1B	MAP2	MAP4	MAPK8IP3	MAPT	NAGLU	NCAM1	NCDN	NCS1
translation	Group1	AGO1	AKT2	CNOT10	DHFR	DHX36	EGFR	EIF4A1	EIF6	FARSB	FXR1	GAPDH	HNRNPLL	METTL16	NCBP1	PA2G4	PFDN1	PTBP1	SHMT2	TPR	VIM
[truncated: 47 more columns]
